# Supplementary material for: 3D Geological Model for Germany and Adjacent Areas
Source: Copernicus journal article supplement (doi:10.5194/essd-2025-320), 2025-06-25
Supplement: Supplementary file 1 [file essd-2025-320-supplement.zip]

| **Short name** | **Full name** | **Reference** | **Reference**  **number** |
| --- | --- | --- | --- |
| Netherlands | Digital Geological Model (DGM) deep V5 on- and offshore | TNO (2019a) | 1 |
| Netherlands 2 | SCAN - 2D Seismic Interpretation and Depth Conversion for Dinantian | TNO (2019b) | 2 |
| TUNB | 3D-Modell des geologischen Untergrundes des Norddeutschen Beckens | BGR et al. (2022) | 3 |
| Vlaanderen | Geologisch (G3Dv3) en hydrogeologisch (H3D) 3D-lagenmodel van Vlaanderen | Deckers et al. (2019) | 4 |
| Landesmodell NRW | Landesmodell Nordrhein-Westfalen | Geologischer Dienst NRW (2022) | 5 |
| Hessen | Hessen 3D 2.0 | Bär et al. (2021) | 6 |
| Hessen 2 | Hessen 3D 2.0 Erweiterung | Weinert et al. (2022) | 7 |
| Thueringer Becken | Geologisches 3D-Modell „Thüringer Becken“ | TLUBN (2014) | 8 |
| NW Sachsen | Geologisches 3D Modell NW-Sachsen | Görne (2011) | 9 |
| SN Zwischengebiet | Geologisches 3D Modell des "Zwischengebietes" | Görne (2012b) | 10 |
| Niederlausitz | Geologisches 3D Modell der Niederlausitz | Görne & Geißler (2015) | 11 |
| Elbtalzone | Geologisches 3D Modell der Elbtalzone | Görne (2012a) | 12 |
| Erzgebirge | 3D Model of the Erzgebirge | Kirsch et al. (2017) | 13 |
| GeORG | Geopotentiale des tieferen Untergrundes im Oberrheingraben | GeORG-Projektteam (2013) | 14 |
| Landesmodell BW | Geologisches Landesmodell von Baden-Württtemberg | Rupf & Nitsch (2008) | 15 |
| Geothermieatlas BY | Bayerischer Geothermieatlas | LfU (2022) | 16 |
| Ingolstadt | Geologisches 3D-Modell Region Ingolstadt | Ringseis et al. (2020) | 17 |
| Niederbayern | Geologisches 3D Modell Niederbayern | Donner (2020) | 18 |
| GeoMol Swiss | GeoMol Geological Model 2019 | Swisstopo (2019) | 19 |
| GeoMol LCA BW | GeoMol pilot area Lake Constance - Allgäu (Baden-Wuerttemberg) | GeoMol LCA-Projectteam (2015a) | 20 |
| GeoMol LCA BY | GeoMol pilot area Lake Constance - Allgäu (Bavaria) | GeoMol LCA-Projectteam (2015b) | 21 |
| GeoMol FWM BY | GeoMol framework model (Bavaria) | GeoMol Team (2015b) | 22 |
| GeoMol UA-UB BY | GeoMol pilot area Upper Austria – Upper Bavaria (Bavaria) | GeoMol UA-UB-Projectteam (2015) | 23 |
| GeoMol Austria | GeoMol – Geologische 3D-Modellierung des österreichischen Molassebeckens und Anwendungen in der Hydrogeologie und Geothermie im Grenzgebiet von Oberösterreich und Bayern | Pfleiderer et al. (2016) | 24 |
| CEBS | Central European Basin model | Maystrenko & Scheck-Wenderoth (2013) | 25 |
| 3DD | 3-D-Deutschland | Anikiev et al. (2019) | 26 |
| LSCE | Lithospheric structure of Central Europe | Tašárová et al. (2016) | 27 |
